# Supplementary material
Source: publisher figshare collection journal article supplement (https://tandf.figshare.com/ndownloader/files/22743743)
Supplement: Supplementary file 1 [file 22743743]

**Synthesis, Structure and Luminescence Property of A Three-dimensional Cd(II) Coordination Polymer with (3, 7)-connected Topology**

**Zhao-Hao Li·Jun Zhang·Qiu-Pei Qin**

**College of Chemistry and Chemical Engineering, and Henan Key Laboratory of Function-Oriented Porous Materials, Luoyang Normal University, Luoyang, Henan 471934, P. R. China**

**Table S1** Selected bond distances (Å) and angles (º) for compound **1*.***

|  | | | | | |
| --- | --- | --- | --- | --- | --- |
| Compound **1** | | | | | |
| Cd(1)−O(1) | 2.204(2) | Cd(1)−O(3)#1 | 2.338(2) | Cd(1)−O(4)#1 | 2.438(2) |
| Cd(1)−O(5) | 2.331(2) | Cd(1)−N(5)#2 | 2.279(3) | Cd(1)−N(1) | 2.275(3) |
| Cd(2)−O(2) | 2.274(2) | Cd(2)−O(4)#1 | 2.315(2) | Cd(2)−O(6) | 2.239(2) |
| Cd(2)−O(7)#3 | 2.313(2) | Cd(2)−O(8)#3 | 2.378(2) | Cd(2)−N(3)#4 | 2.487(3) |
| O(3)#1−Cd(1)−O(1) | 150.09(8) | O(4)#1−Cd(1)−O(1) | 95.13(8) | O(5) −Cd(1)−O(1) | 87.23(10) |
| O(5)−Cd(1)−O(4)#1 | 81.96(8) | O(3)#1−Cd(1)−O(5) | 87.27(8) | N(1)−Cd(1)−O(5) | 85.35(10) |
| N(1)−Cd(1)−O(3)#1 | 116.33(9) | N(1)−Cd(1)−O(4)#1 | 164.85(9) | O(4)#1−Cd(1)−O(3)#1 | 54.98(7) |
| N(1)−Cd(1)−N(5)#2 | 92.38(11) | N(5)#2−Cd(1)−O(3)#1 | 88.72(9) | N(1) −Cd(1)−O(1) | 92.47(10) |
| N(5)#2−Cd(1)−O(1) | 98.48(10) | N(5)#2−Cd(1)−O(4)#1 | 99.41(9) | N(5)#2−Cd(1)−O(5) | 173.95(11) |
| O(2)−Cd(2)−O(4)#1 | 89.87(8) | O(2)−Cd(2)−O(7)#3 | 93.69(9) | O(2)−Cd(2)−O(8)#3 | 106.22(9) |
| O(2)−Cd(2)−N(3)#4 | 170.97(9) | O(4)#1−Cd(2)−O(8)#3 | 143.62(8) | O(4)#1−Cd(2)−N(3)#4 | 85.73(8) |
| O(2)−Cd(2)−O(6) | 86.59(9) | O(4)#1−Cd(2)−O(6) | 117.48(9) | O(7)#3−Cd(2)−O(6) | 151.22(10) |
| O(2)−Cd(2)−O(8)#3 | 96.27(10) | N(3)#4−Cd(2)−O(6) | 88.45(10) | O(7)#3−Cd(2)−O(4)#1 | 91.29(9) |
| O(7)#3−Cd(2)−O(8)#3 | 56.01(9) | N(3)#4−Cd(2)−O(7)#3 | 94.29(9) | O(8)#3−Cd(2)−N(3)#4 | 81.81(9) |
| Symmetry codes: #1 1+ x, y, z; #2 1/2+ x, 3/2 - y, 1/2+ z; #3 1/2+ x, 1/2 - y, 1/2+ z; #4 2 - x, 1 - y, 1 -z. | | | | | |

**

**

**Fig. S1**. The IR spectrum of compound **1**.
